# Supplementary material for: LAS1L interacts with the mammalian Rix1 complex to regulate ribosome biogenesis
Source: PubMed Central journal article supplement — Mol Biol Cell. 2012 Feb 15;23(4):716–28. doi: 10.1091/mbc.E11-06-0530 (PMC3279398; doi:10.1091/mbc.e11-06-0530), 2012-02-15
Supplement: supp_E11-06-0530_CombinedSupMats.pdf [file supp_E11-06-0530_CombinedSupMats.pdf]

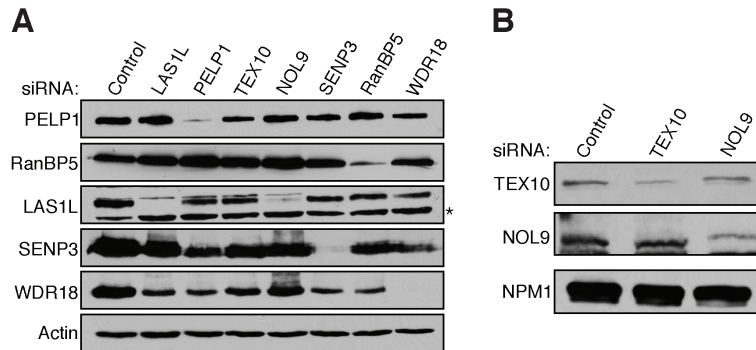

**Figure S1.** Antibodies used in this study are specific for the corresponding protein. (A) HEK 293T cells were transfected with the indicated gene-specific siRNA. After forty-eight hours, cells lysates were separated by SDS-PAGE and analyzed by Western blotting with the indicated antibody. (B) HEK 293T cells were transfected with the indicated gene-specific siRNA. After forty-eight hours, nucleolar extracts were separated by SDS-PAGE and analyzed by Western blotting with the indicated antibody.
